# Supplementary material for: Cathelicidin antimicrobial protein, vitamin D, and risk of death in critically ill patients
Source: Springer Nature journal article supplement (doi:10.1186/s13054-015-0812-1), 2015-02-23
Supplement: MOESM2 [file 9780234]

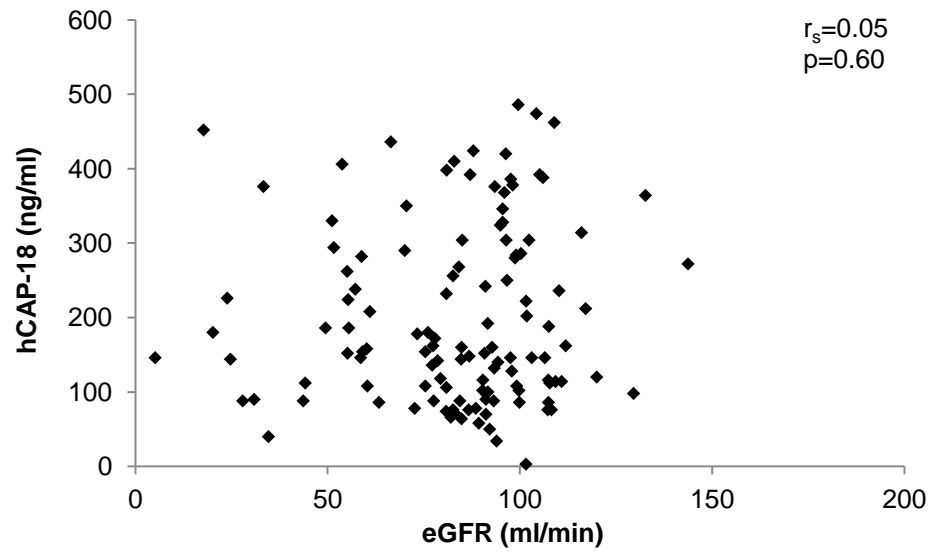

**Additional File 2. Plasma hCAP18 levels on ICU Day 1 and eGFR.** Plasma hCAP18 levels on ICU Day 1 showed no correlation with eGFR. eGFR=estimated Glomerular Filtration Rate (calculated using the Chronic Kidney Disease Epidemiology Collaboration (CKD-EPI) equation).
