# Supplementary material for: Cathelicidin antimicrobial protein, vitamin D, and risk of death in critically ill patients
Source: Springer Nature journal article supplement (doi:10.1186/s13054-015-0812-1), 2015-02-23
Supplement: MOESM3 [file 9780234]

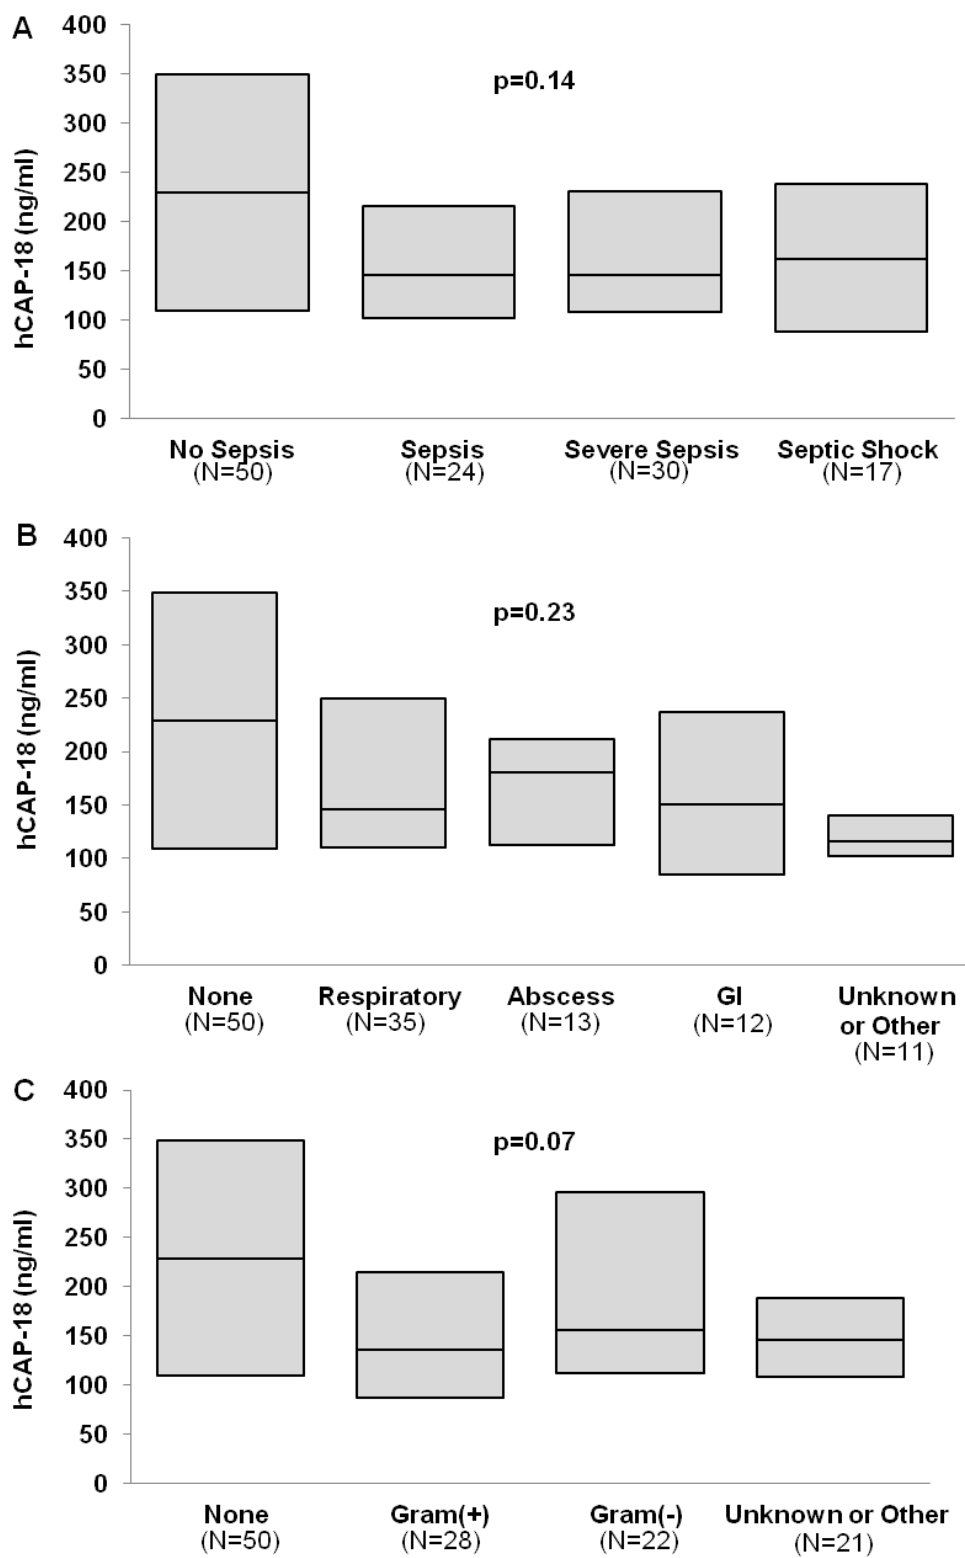

**Additional File 3. Plasma hCAP18 levels on ICU Day 1 by (A) sepsis severity, (B) primary site of infection, and (C) primary type of organism.**
